# Supplementary material for: Canadian clinical capacity for fetal alcohol spectrum disorder assessment, diagnosis, disclosure and support to children and adolescents: a cross-sectional study
Source: HighWire-hosted journal article supplement (doi:10.1136/bmjopen-2022-065005), 2022-08-01
Supplement: bmjopen-2022-065005supp001_data_supplement.pdf [file bmjopen-2022-065005supp001_data_supplement.pdf]

**Supplementary Table 1. Description of CanDiD study variables.**

| Study variable                                                                                                                                           | Response choices                                                                                                                                          | Recorded for analysis                                                                                             |
|----------------------------------------------------------------------------------------------------------------------------------------------------------|-----------------------------------------------------------------------------------------------------------------------------------------------------------|-------------------------------------------------------------------------------------------------------------------|
| <b>General information on the clinic</b>                                                                                                                 |                                                                                                                                                           |                                                                                                                   |
| What best describes your role at the clinic?                                                                                                             | Pediatrician; Family physician; Occupational therapist; Speech-language pathologist; Psychologist; Clinic manager; Community coordinator; Other (specify) | -                                                                                                                 |
| Where is your clinic located (province)                                                                                                                  | As is                                                                                                                                                     | Atlantic provinces (NB, NS, NFLD, PEI); Central Canada (ON, QC); Western and Northern Canada (MB, SK, AB, BC, YK) |
| What year did your clinic become operational?                                                                                                            | As is                                                                                                                                                     | -                                                                                                                 |
| What are your sources of funding (check all that apply)?                                                                                                 | Federal funding; Provincial funding; Research grant; Non-governmental organization (NGO); Other                                                           | -                                                                                                                 |
| What services does your clinic offer (check all that apply)?                                                                                             | Prevention; Screening; Diagnosis; Support to families; Training for health professionals; Other (specify)                                                 | Prevention; Screening; Diagnosis; Support to families; Training for health professionals                          |
| In a typical year ( <i>please think about a normal year prior to COVID-19 pandemic</i> ), how many new FASD referrals does your clinic receive?          | As is                                                                                                                                                     | -                                                                                                                 |
| In a typical year ( <i>please think about a normal year prior to the COVID-19 pandemic</i> ), how many FASD assessments are completed?                   | As is                                                                                                                                                     | -                                                                                                                 |
| Does your clinic require a confirmation of prenatal alcohol exposure OR the presence of the 3 sentinel facial features for a FASD diagnostic assessment? | Yes; No                                                                                                                                                   | -                                                                                                                 |
| <b>Interdisciplinary team composition</b>                                                                                                                |                                                                                                                                                           |                                                                                                                   |
| Does your clinic diagnose FASD in infants <18 months?                                                                                                    | Yes; No                                                                                                                                                   | -                                                                                                                 |

|                                                                                                                                                               |                                                                                                                                                                                                |   |
|---------------------------------------------------------------------------------------------------------------------------------------------------------------|------------------------------------------------------------------------------------------------------------------------------------------------------------------------------------------------|---|
| Is the FASD diagnosis of infants <18 months done by an interdisciplinary team?                                                                                | Yes; No                                                                                                                                                                                        | - |
| Which healthcare professionals are included in the interdisciplinary team for the diagnosis of infants <18 months (check all that apply)?                     | Pediatrician; Family physician; Occupational Therapist; Speech-language pathologist; Psychologist; Other (specify)                                                                             | - |
| Does your clinic diagnose FASD in children 18 months – 5 years?                                                                                               | Yes; No                                                                                                                                                                                        | - |
| Is the FASD diagnosis of children 18 months – 5 years done by an interdisciplinary team?                                                                      | Yes; No                                                                                                                                                                                        | - |
| Which healthcare professionals are included in the interdisciplinary team for the diagnosis of children 18 months – 5 years (check all that apply)?           | Pediatrician; Family physician; Occupational Therapist; Speech-language pathologist; Psychologist; Other (specify)                                                                             | - |
| Does your clinic diagnose FASD in children/adolescents aged 6 – 18 years?                                                                                     | Yes; No                                                                                                                                                                                        | - |
| Is the FASD diagnosis of children/adolescents aged 6 – 18 years done by an interdisciplinary team?                                                            | Yes; No                                                                                                                                                                                        | - |
| Which healthcare professionals are included in the interdisciplinary team for the diagnosis of children/adolescents aged 6 – 18 years (check all that apply)? | Pediatrician; Family physician; Occupational Therapist; Speech-language pathologist; Psychologist; Other (specify)                                                                             | - |
| <b>Current diagnosis reporting practices</b>                                                                                                                  |                                                                                                                                                                                                |   |
| Who is responsible for announcing the FASD diagnosis to parent(s)/legal guardian(s)?                                                                          | Pediatrician; Family physician; Occupational Therapist; Speech-language pathologist; Psychologist; Other (specify)                                                                             | - |
| When announcing the FASD diagnosis to parent(s)/legal guardian(s), is the diagnosis reported to the child/adolescent at the same time?                        | No; Yes, always; Yes, sometimes                                                                                                                                                                | - |
| Who is responsible for announcing the FASD diagnosis to the child/adolescent assessed?                                                                        | Pediatrician / Family physician at the clinic; Another member of the interdisciplinary team at the clinic; Parent(s)/legal guardian(s); Family doctor (outside of the clinic); Other (specify) | - |

|                                                                                                                                                                                                                                                                                          |                                                                                                                                                                                                                                                |   |
|------------------------------------------------------------------------------------------------------------------------------------------------------------------------------------------------------------------------------------------------------------------------------------------|------------------------------------------------------------------------------------------------------------------------------------------------------------------------------------------------------------------------------------------------|---|
| What factor(s) determine(s) whether the child/adolescent is present during the FASD disclosure (check all that apply)?                                                                                                                                                                   | Parents'/legal guardians' request; Child/adolescent developmental age; Child/adolescent chronological age; Clinical judgement of possible impact of the FASD diagnosis on the child/adolescent; The clinic's policy; Other (specify)           | - |
| Does your clinic use any of the following explanatory tools when announcing the FASD diagnosis to parent(s)/legal guardian(s) (check all that apply)...? Please think of tools you use to facilitate the disclosure, not tools used as a mode of delivery, such as Zoom or Skype.        | (i) Visual tools (pictures, graphs); (ii) Electronic tools (ipads, computers); (iii) Communication tools (analogies); (iv) Other (specify)<br><br>(Yes, No) for each item                                                                      | - |
| Does your clinic use any of the following explanatory tools when announcing the FASD diagnosis to children/adolescents (check all that apply)...? Please think of tools you use to facilitate the announce disclosure ment, not tools used as a mode of delivery, such as Zoom or Skype. | (i) Visual tools (pictures, graphs); (ii) Electronic tools (ipads, computers); (iii) Communication tools (analogies); (iv) Other (specify)<br><br>(Yes, No, Clinic does not disclose the FASD diagnosis to the child/adolescent) for each item | - |
| <b>Immediate and post-diagnosis support and counseling</b>                                                                                                                                                                                                                               |                                                                                                                                                                                                                                                |   |
| Does your clinic provide any support/counseling to families during the FASD disclosure?                                                                                                                                                                                                  | (i) Support/counseling to the parents/caregivers; (ii) Support/counseling to the child/adolescent; (iii) Support/counseling to sibling/other family member<br><br>(Yes, No) for each item                                                      | - |
| Does your clinic provide any support/counseling to families in the 3-month period following the disclosure?                                                                                                                                                                              | (i) Support/counseling to the parents/caregivers; (ii) Support/counseling to the child/adolescent; (iii) Support/counseling to sibling/other family member                                                                                     | - |

|                                                                                                                                                                         | (Yes, No) for each item                                                                                                                                                                                                                                       |   |
|-------------------------------------------------------------------------------------------------------------------------------------------------------------------------|---------------------------------------------------------------------------------------------------------------------------------------------------------------------------------------------------------------------------------------------------------------|---|
| During the FASD disclosure or in the following 3-month period, does your clinic provide information on any of the following to families in need (check all that apply)? | FASD (pamphlets, brochures); FASD support groups for families; Financial aid programs; Respite care programs; Support worker programs; Housing programs; Mental health programs (other than those offered at the clinic); Jordan's principle; Other (specify) | - |
